# Supplementary material for: FADS1 and FADS2 Gene Polymorphisms Modulate the Relationship of Omega-3 and Omega-6 Fatty Acid Plasma Concentrations in Gestational Weight Gain: A NISAMI Cohort Study
Source: Nutrients. 2022 Mar 2;14(5):1056. doi: 10.3390/nu14051056 (PMC8912382; doi:10.3390/nu14051056)
Supplement: Supplementary file 1 [file nutrients-14-01056-s001.zip › nutrients-1549456-Supplementary Materials.pdf]

# Supplementary Materials:

**Table S1.** Characteristics of the FADS1 and FADS2 gene polymorphisms that will be used in the study on pregnant women from the NISAMI Cohort.

| SNP       | Gene               | Chromosome Position <sup>1</sup> | Alleles <sup>2</sup> |
|-----------|--------------------|----------------------------------|----------------------|
| (M/m)2    |                    |                                  |                      |
| rs174575  | FADS2 intron1      | 61834531                         | C / G                |
| rs174561  | FADS1 intron1      | 61339284                         | T / C                |
| rs3834458 | Intergenic (FADS2) | 61351497                         | T / Del <sup>3</sup> |

<sup>1</sup>Chromosome position was obtained from the National Center for Biotechnology (NCBI, 2015).<sup>2</sup> M = major allele; m = minor allele. <sup>3</sup> Del = Deletion.

**Table S2.** FADS1 and FADS2 gene polymorphisms by anthropometric profile in the study on pregnant women from the NISAMI Cohort. Santo Antonio de Jesus, Bahia. 2013–2015

| No excess weight gain       | Excess gestational weight gain | p-value * | No excess weight gain | Excess gestational weight gain | p-value * |
|-----------------------------|--------------------------------|-----------|-----------------------|--------------------------------|-----------|
| Gene                        | N                              | %         | N                     | %                              | p value * |
| <b>SNP FADS2 rs174575</b>   |                                |           |                       |                                |           |
| MM                          | 50                             | 48 .15    | 33                    | 52 .27                         | 0 .279    |
| Mm e mm                     | 66                             | 51 .85    | 36                    | 47 .73                         |           |
| <b>SNP FADS 1 rs174561</b>  |                                |           |                       |                                |           |
| MM                          | 70                             | 61 .11    | 42                    | 62 .50                         | 0 .903    |
| Mm e mm                     | 46                             | 38 .89    | 27                    | 37 .50                         |           |
| <b>SNP FADS 2 rs3834458</b> |                                |           |                       |                                |           |
| MM                          | 67                             | 59 .26    | 39                    | 57 .95                         | 0 .776    |
| Mm e mm                     | 49                             | 40 .74    | 30                    | 42 .05                         |           |

n= 85:555 observations. Abbreviations: FADS: Desaturase gene polymorphisms; Del, deletion; HWE, Hardy-Weinberg equilibrium; MAF, Minor allele frequency; MM, high-frequency homozygote; mm, low-frequency homozygote; Mn, heterozygote; SNP, single nucleotide polymorphism.\*Derived from the chi-square test.

**Table S3.** Characteristics of polymorphisms of the desaturase gene (FADS) in the sample of pregnant women followed by the NISAMI Cohort. Santo Antonio de Jesus, Bahia. 2013–2015.

| Gene          | Genotype (%) | MAF (%)     |
|---------------|--------------|-------------|
|               | MM           | Mm          |
| <b>FADS2</b>  |              |             |
| rs174575      | CC (44 .9)   | CG (45 .9)  |
| <b>FADS 1</b> |              |             |
| rs174561      | TT (60 .5)   | TC (33 .5)  |
| <b>FADS 2</b> |              |             |
| rs3834458     | TT (57 .3)   | TDel (34,6) |

<sup>1</sup> n = 185: 555 observations. Abbreviations: FADS: Desaturase gene polymorphisms; Del, deletion; HWE, Hardy-Weinberg equilibrium; MAF, Minor allele frequency; MM, high-frequency homozygote; mm, low-frequency homozygote; Mn, heterozygote; SNP, single nucleotide polymorphism.a Derived from the chi-square test of the Hardy-Weinberg equilibrium.
